# Supplementary material
Source: publisher figshare collection journal article supplement (https://karger.figshare.com/articles/dataset/_/3830667)
Supplement: Supplementary file 1 [file 1]

## Appendix A.

| SNP                                         | Cohort  | SNP present | SNP absent | SNP Percentage | Fisher exact Test |
|---------------------------------------------|---------|-------------|------------|----------------|-------------------|
| TERT, Exon 2, codon 279 GCC/ACC (Ala/Thr)   | Control | 10          | 518        | 1.9            | P=0.13            |
|                                             | APL     | 4           | 86         | 4.4            |                   |
| TERT, Exon 15, codon 1062 GCC/ACC (Ala/Thr) | Control | 7           | 521        | 1.3            | P=0.63            |
|                                             | APL     | 2           | 88         | 2.2            |                   |
