# Supplementary material
Source: publisher figshare collection journal article supplement (https://karger.figshare.com/articles/dataset/_/3830667)
Supplement: Supplementary file 1 [file 1]

**Appendix A.** *APLs and Controls Sequencing for human TERT and TERC*

Sanger sequencing for TERT and TERC genes failed to identify mutations, apart from the exon 2 codon 279 (GCC/ACC - Ala/Thr) and exon 15 codon 1062 (GCC/ACC - Ala/Thr) polymorphisms in the TERT, which were previously identified.
